# Supplementary material for: Synthesis, characterization and mechanistic studies of an activated carbon-supported nickel (Ni/C) catalyst for the effective amidation of aldehydes
Source: Royal Society of Chemistry journal article supplement (doi:10.1039/d5ra02647d), 2025-01-01
Supplement: d5ra02647d1.pdf [file d5ra02647d1.pdf]

## **Synthesis, Characterization and Mechanistic Studies of Activated Carbon Supported Nickel (Ni/C) Catalyst for the Effective Amidation of Aldehyde**

Mohammad Kamrojjaman,<sup>a</sup> Ashutosh Nath,<sup>b</sup> Rifat Jahan,<sup>c</sup> Mehdi Ahmed Bhuiyan,<sup>c</sup> Shakhawat Ullah  
Siyam,<sup>c</sup> Md Ayub Ali <sup>\*a,d</sup>

### **Supporting Information**

| <b>Table of Contents:</b>                                  | <b>Page No</b> |
|------------------------------------------------------------|----------------|
| 1) Experimental Process.....                               | 02             |
| 2) Synthesis of N-Bezylbenzamide.....                      | 02             |
| 3) Synthesis of N-Phenyl Benzamide.....                    | 04             |
| 4) Surface morphology of Ni and Supported Ni catalyst..... | 05             |
| 5) Energy dispersive x-ray (EDX) spectral analysis.....    | 05             |
| 6) Catalyst screening.....                                 | 06             |
| 7) Solvent Screening.....                                  | 07             |
| 8) Reusability of Ni/C.....                                | 08             |
| 9) DFT Calculation Data.....                               | 09             |
| 10) Spectra of the compound 1.....                         | 12             |
| 11) Spectra of the compound 2.....                         | 14             |

## 1. Experimental Process

For catalyst preparation, the supported precursor was prepared by pouring the support (activated carbon) over nickel chloride solution with appropriate concentration. After 15 min of rotation, the mixture was heated and dried at 383 K for 1h. The reduction of the supported precursors was performed in a 2 necked reaction flask fitted with a reflux condenser in a sand bath for heating. The reaction mixture was heated at 353 K under continuous stirring in an excess hydrazine solution to maintain desired pH. After reduction the solid obtained was filtrated off, washed with distilled water and dried to get expected Ni/AC catalyst. Then it was characterized by several spectroscopic techniques such as SEM, XRD etc. The morphology and particle size of catalyst was imaged by scanning electron microscope. Then the catalytic activity was checked by model reaction. For the model reaction, two reactants (benzaldehyde and benzyl amine) were added to a round bottom flask in 1:2 ratios to the catalyst. Then solvent was added to the reaction mixtures. This reaction mixture was heated around at 140 °C for 36 h with continuous stirring by magnetic bar. The progress of the reaction was monitored by thin layer chromatography with proper solvents. Finally, completion of the reaction was confirmed by TLC. After the completion of the reaction, catalyst was separated from the mixture by centrifugation, followed by washing with acetone and drying at 90 °C for 3 h. The recovered catalyst was reused over several cycles without a marked decrease in the yield of the product. The solvent was removed from mixture by rotatory evaporator. The products were purified by column chromatography & recrystallization separation technique. The synthesized pure amide products were identified by FT-IR,  $^1\text{H}$  NMR,  $^{13}\text{C}$  NMR. Same reaction procedure was followed for catalyst screening, solvent screening and optimization of other reaction parameters.

## Computational Method

Gaussian 16 program and RB3LYP were performed with the basis set of 3-21G and the density functional theory (DFT) method was used and the values were determined in Hartree–Fock (HF) unit.

### Synthesis of N-Bezylbenzamide

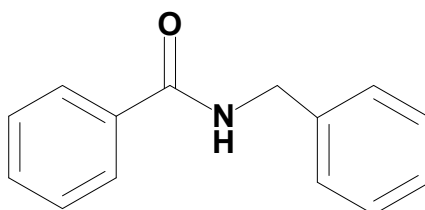

For synthesis of *N*-Benzyl benzamide, benzaldehyde (1 mmol) and benzylamine (1 mmol) were taken in a RB flask containing 15 mol% Ni/C and then added 5 mL *o*-xylene in the mixture. This reaction mixture was heated on hot plate around at 150 °C for 36 hrs in a sand bath with continuous stirring of magnetic bar at 300 rpm. The progress of the reaction and reaction completion was confirmed by TLC. After the completion of the reaction, 5 ml 2-propanol was added to dissolve amides mixture. Then, Ni/C was separated from the mixture by centrifugation followed by washing with acetone and dried at 110°C for 3 hrs. The recovered Ni/C was reused for three cycles without a marked decrease in the yield of the product. The solvent was removed from mixture by rotatory evaporator. Finally, the amide was purified by column chromatography with chloroform and *n*-hexane and recrystallization separation technique in ethanol/water system.

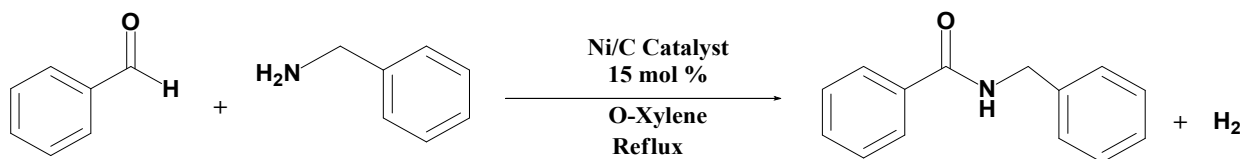

**Scheme S1 : Synthesis of N-Bezylbenzamide**

Molecular weight: 212 g/mol

Molecular formula: C<sub>14</sub>NOH<sub>13</sub>

Solubility: Soluble in Chloroform.

Melting Point: 104-107 °C

FT-IR (u KBr): 3457.52, 3063.06, 2850.88, 1644.37, 1601.93, 1550.82, 1454.38 cm<sup>-1</sup>

<sup>1</sup>H-NMR (400 MHz, CDCl<sub>3</sub>): δ 8.074-8.076 (m, 2H, C-3), 7.390-7.458 (m, 3H, C-2), 7.227-7.287 (m, 5H, C-1), 5.279 (s, 1H, -NH, N-5), 4.038 (s, 2H, C-4)

<sup>13</sup>C-NMR (100 MHz, CDCl<sub>3</sub>) : δ 170.62 (C=O, 1C, C-9), 134.31 (1C, C-8), 131.46 (1C, C-7), 128.81 (2C, C-1, C-6), 128.75 (4C, C-4, C-5), 127.04 (4C, C-2, C-3), 50.70 (1C, C-9)

GC-MS ( $\text{CDCl}_3$ ): The GC-MS spectrum exhibited retention time (in min) 7.091 min. mass spectrum (in m/e): Molecular ion peak (m/e): 211, Base peak (m/e): 105 and others m/e at 91, 77.

### Synthesis of N-Phenyl Benzamide

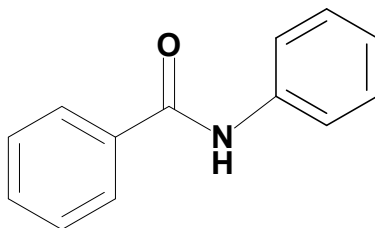

For synthesis of *N*-Phenylbenzamide, benzaldehyde (1 mmol) and aniline (1 mmol) were taken in a RB flask containing 15 mol% Ni/C and then added 5 mL *o*-xylene in the mixture. The mixture was heated on hot plate around at 150 °C for 36 h in a sand bath with continuous stirring of magnetic bar at 300 rpm. The progress of the reaction was monitored by TLC in *n*-hexane and chloroform. Completion of the reaction was confirmed by TLC. After the completion of the reaction, 5 ml 2-propanol was added to dissolve amides mixture. Then, Ni/C was separated from the mixture by centrifugation followed by washing with acetone and dried at 110°C for 3 h. The recovered Ni/C was reused for three cycles without a marked decrease in the yield of the product. The solvent was removed from mixture by rotatory evaporator. Finally, the amide was purified by column chromatography with chloroform and *n*-hexane and recrystallization separation technique with ethanol and water

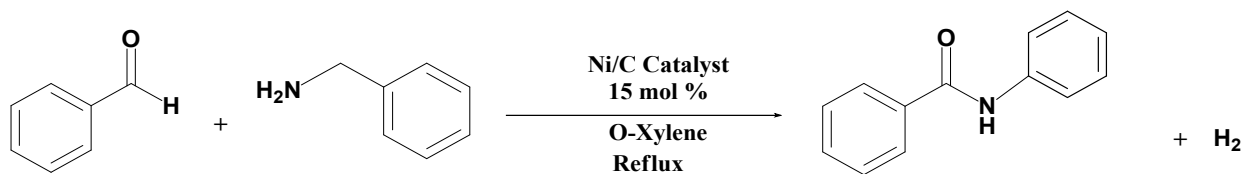

**Scheme S2: Synthesis of N-Phenyl Benzamide**

Molecular weight: 197 g/mol

Molecular formula:  $\text{C}_{13}\text{NOH}_{11}$

Solubility: Soluble in Chloroform.

Melting Point: 162-164 °C

FT-IR ( $\nu$  KBr): 3450, 3063, 1650, 1529.29, 1550.82, 1628.94, 1183.70  $\text{cm}^{-1}$

$^1\text{H}$ -NMR (400 MHz,  $\text{CDCl}_3$ ) :  $\delta$  8.598 (s, 1H, -NH, N-7), 8.119- 8.126 (m, 2H, C-4), 7.875-7.885 (m, 2H, C-3), 7.440-7.611 (m, 3H, C-5, C-6), 7.250-7.421 (m, 2H, C-2), 6.709-6.720 (3, 1H, C-1)

$^{13}\text{C}$ -NMR (100 MHz,  $\text{CDCl}_3$ ):  $\delta$  167.193 (1C, C=O, C-5), 138.909 (1C, C-4), 136.012 (1C, C-6), 131.801 (1C, C-9), 127.383-129.438 (4C, C-2, C-8), 126.10 (2C, C-7), 124.80 (1C, C-1), 121.30 (2C, C-3).

### Surface morphology of Ni and Supported Ni catalyst

**Table S1:** Particle size of Ni and supported Ni Catalysts

| Reduction Ratio | Catalyst                    | Particle Size(nm)<br>SEM |
|-----------------|-----------------------------|--------------------------|
| 1:12:12         | Ni                          | 53                       |
| 1:12:12         | Ni/C                        | 53                       |
| 1:4:4           | Ni/C                        | 121                      |
| 1:12:12         | Ni/ $\text{Al}_2\text{O}_3$ | 67                       |

(a)

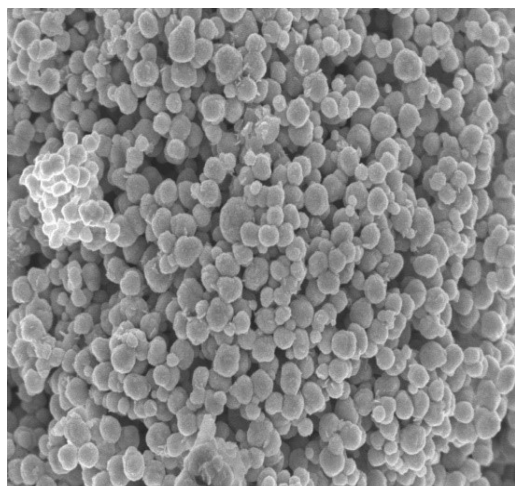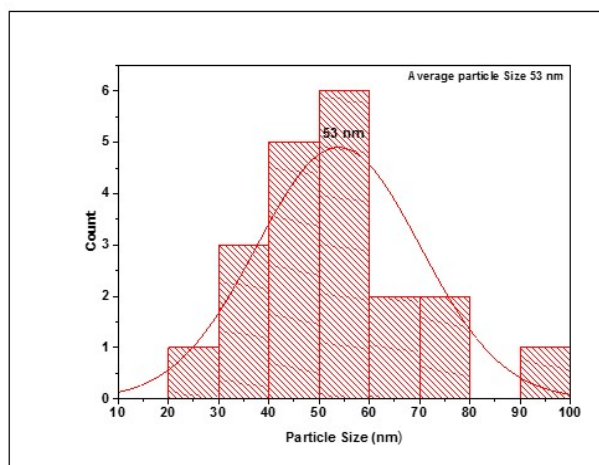

(b)

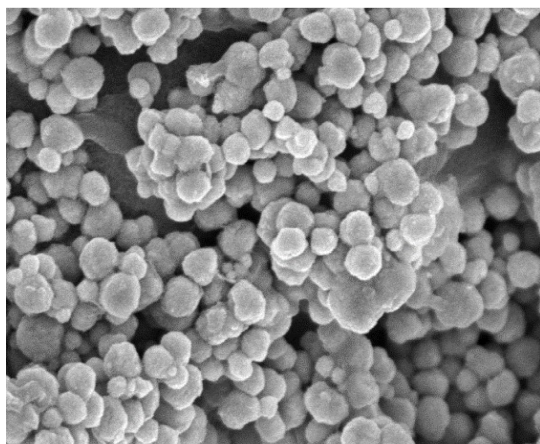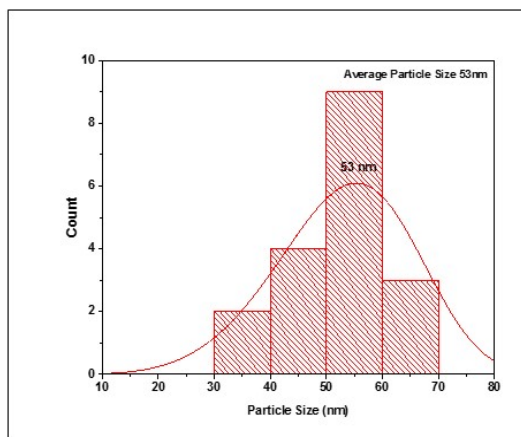

(c)

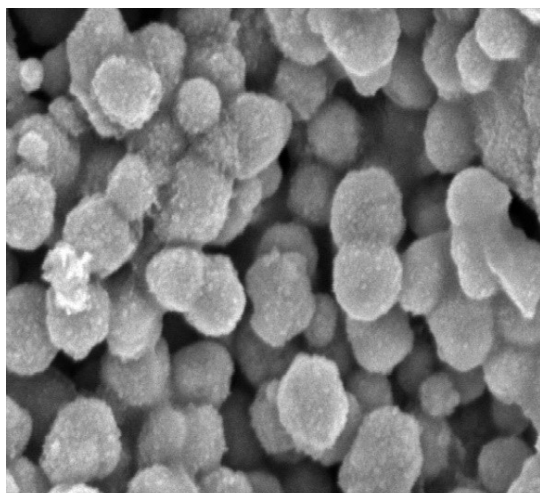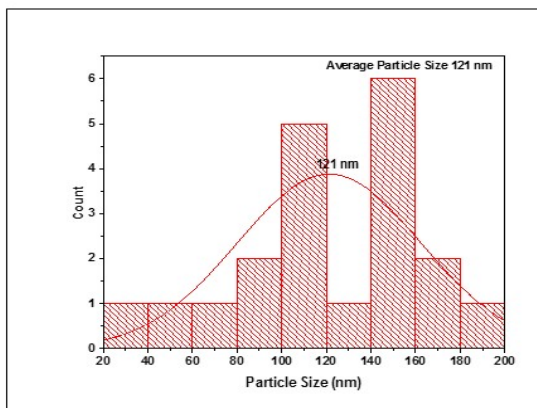

(d)

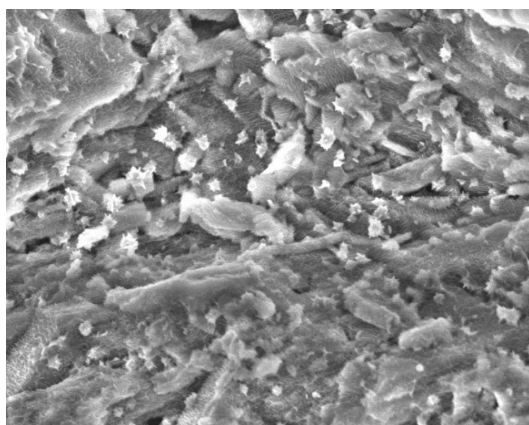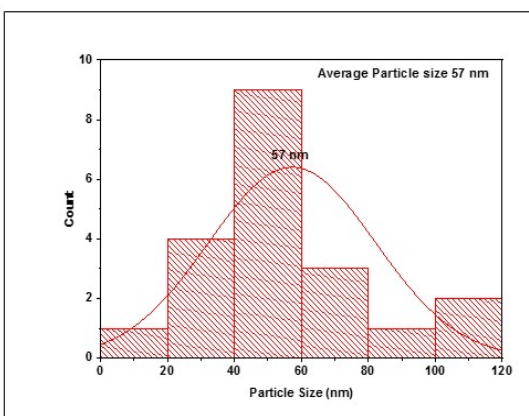

## Energy dispersive x-ray (EDX) spectral analysis

**Table S2:** Atom Percentage of the Nickel and supported Nickel catalysts

| Reduction Ratio | Catalyst                          | Relative atomic (%) (EDX) |                         |
|-----------------|-----------------------------------|---------------------------|-------------------------|
| 1:12:12         | Ni                                | Ni = 100                  | -                       |
| 1:12:12         | Ni/C                              | Ni = 10.04                | C = 89.96               |
| 1:4:4           | Ni/C                              | Ni = 13.36                | C = 86.64               |
| 1:12:12         | Ni/Al <sub>2</sub> O <sub>3</sub> | Ni = 9.11                 | Al = 23.87<br>O = 67.02 |

## Catalyst screening

Model reaction

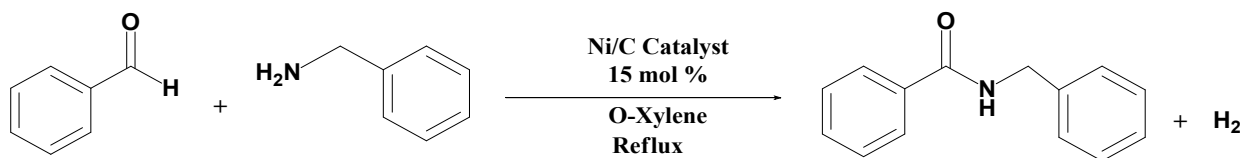

**Table S3 :**Catalyst screening for model reaction

| Entry     | Catalyst            | Reduction Ratio | % of Yields |
|-----------|---------------------|-----------------|-------------|
| <b>01</b> | No Catalyst/Reagent | -               | <b>0</b>    |
| <b>02</b> | Ni                  | 1:12:12         | 13          |
| <b>03</b> | Ni/GO               | 1:12:12         | 34          |
| <b>04</b> | Ni/C                | 1:4:4           | 28          |
| <b>05</b> | Ni/C                | 1:12:12         | 71          |
| <b>06</b> | Ni/C                | 1.35:4.5:3.6    | 14          |

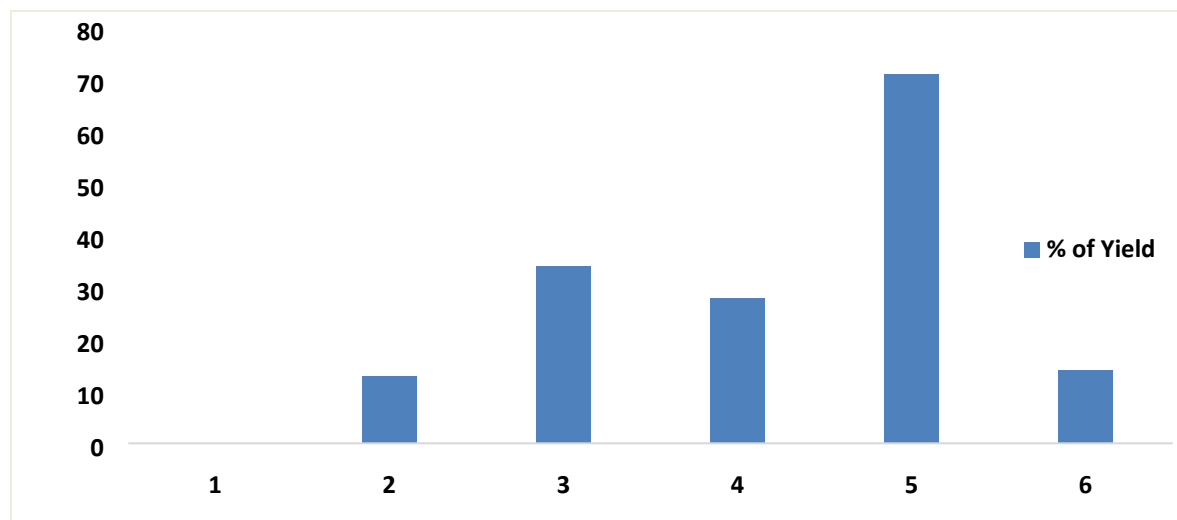

Figure S1: **Catalyst screening for model reaction**

### Solvent Screening

Model reaction

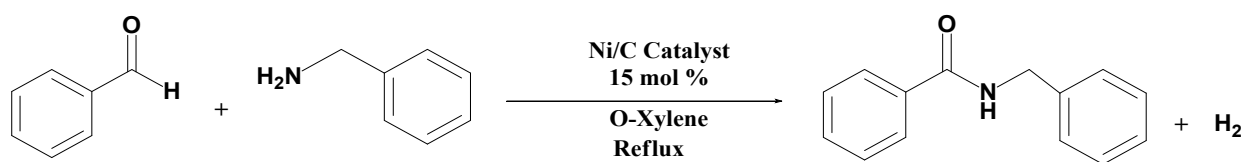

**Table S4** : Solvent screening for model reaction

| Entry | Solvent       | % of Yields |
|-------|---------------|-------------|
| 01    | No solvent    | 0           |
| 02    | o-xylene      | 90          |
| 03    | Benzene       | 20          |
| 04    | Triethylamine | 14          |
| 05    | Toluene       | 29          |

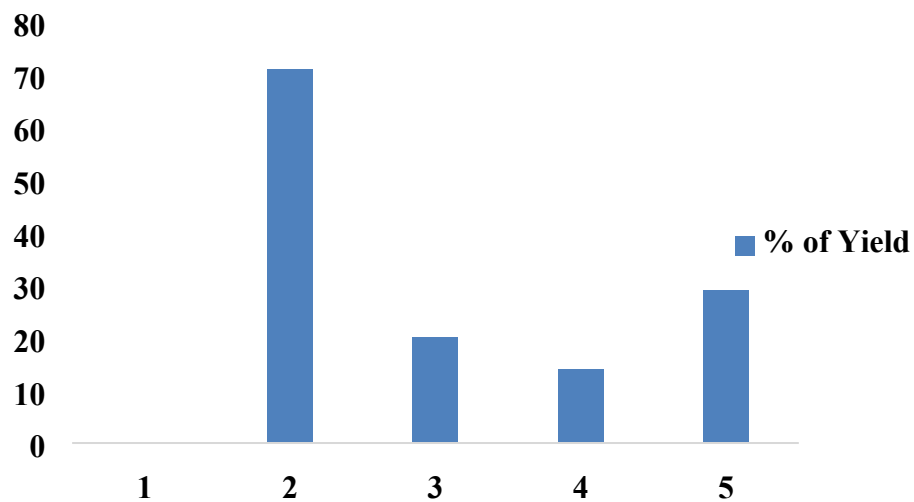

Figure S2: **Solvent screening for model reaction**

### Reusability of Ni/C

Model reaction

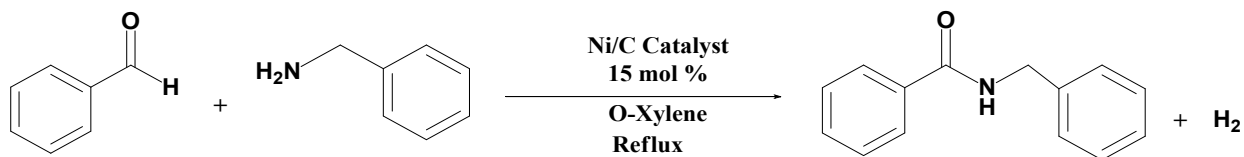

**Table S5:** Reusability of Ni/C for model reaction.

| Cycle Number | Catalyst | % of Yields |
|--------------|----------|-------------|
| 01           | Ni/C     | 71          |
| 02           |          | 68          |
| 03           |          | 65          |

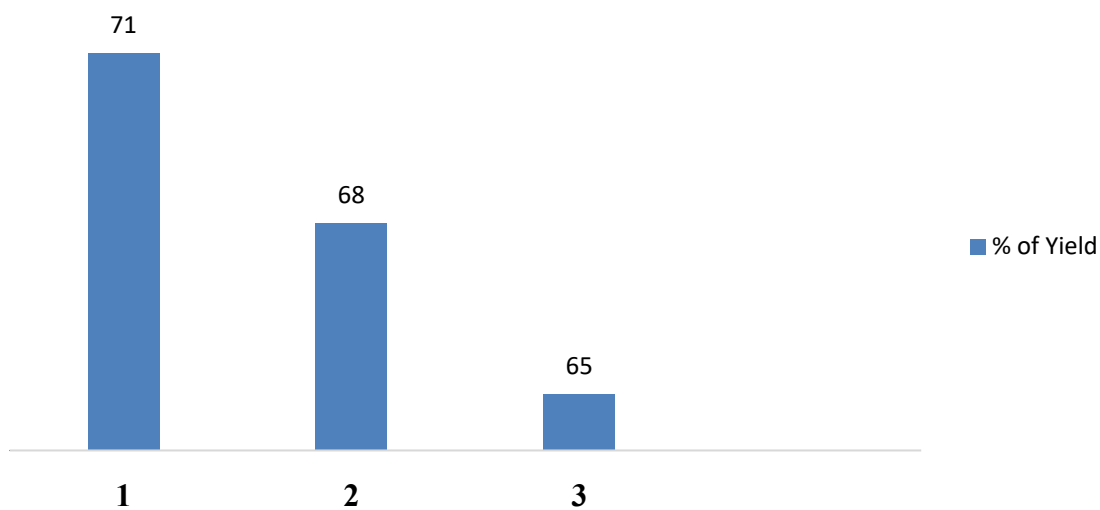

Figure S3 : Reusability of Ni/C for model reaction

#### DFT Calculation Data

Table S6: Energy Chart of Benzamide using Ni/C catalyst

| Name                | Structure                                                                                              | Energy (Hartree) |
|---------------------|--------------------------------------------------------------------------------------------------------|------------------|
| Starting Material 1 | 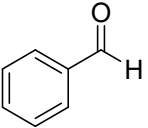 <p>Starting M1</p> | -341.5111421     |

|                        |                                                                                                      |              |
|------------------------|------------------------------------------------------------------------------------------------------|--------------|
| Starting<br>Material 2 | 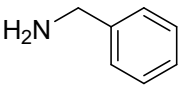 <p>Starting M2</p> | -286.024067  |
| Transition<br>State 1  |                     | -2162.617066 |
| Transition<br>State 2  |                    | -2163.833700 |
| Transition<br>State 3  |                   | -2163.693821 |

|                           |                                                                                   |             |
|---------------------------|-----------------------------------------------------------------------------------|-------------|
| <b>Transition State 4</b> | 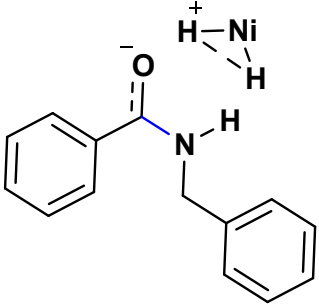 | -667.795128 |
| <b>Final Product</b>      |  | -662.11     |

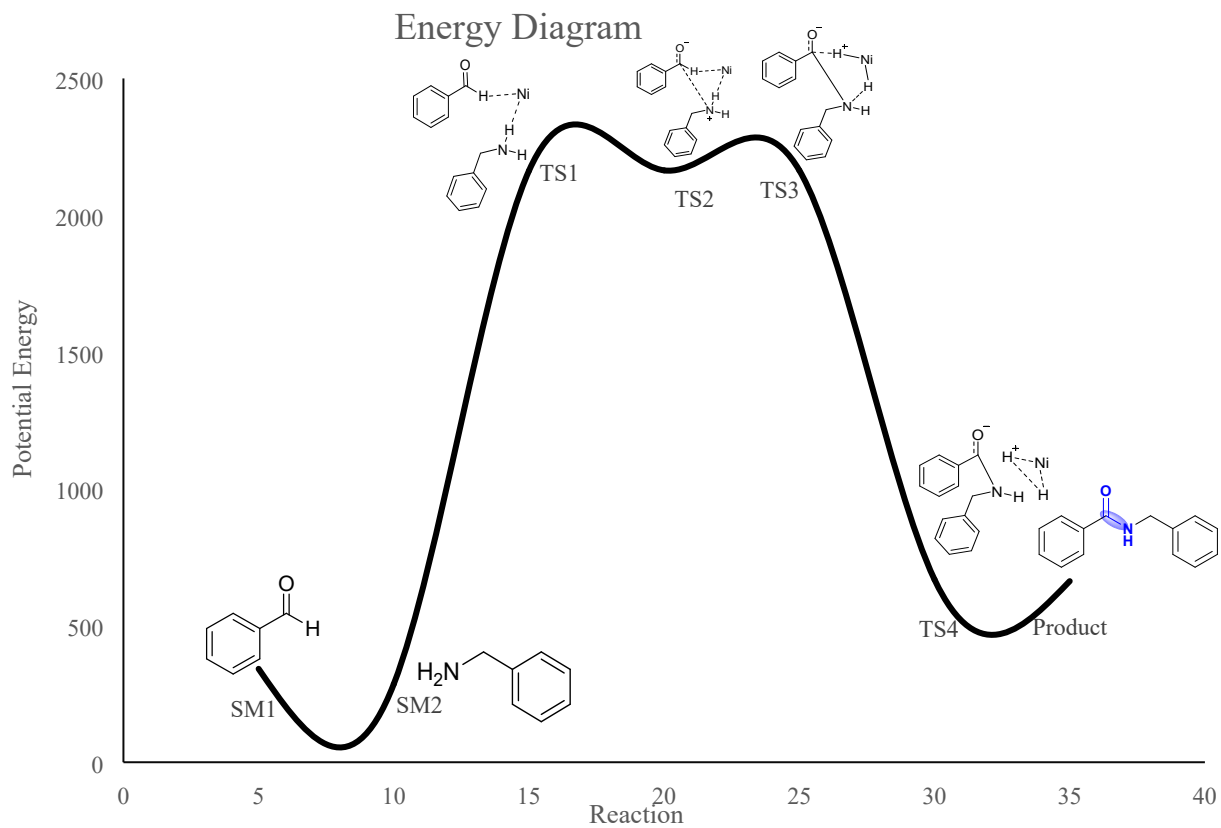

**Figure S4:** Calculated energy profile of Benzamide using Ni/C catalyst

**2. Spectra of the compound 1:**

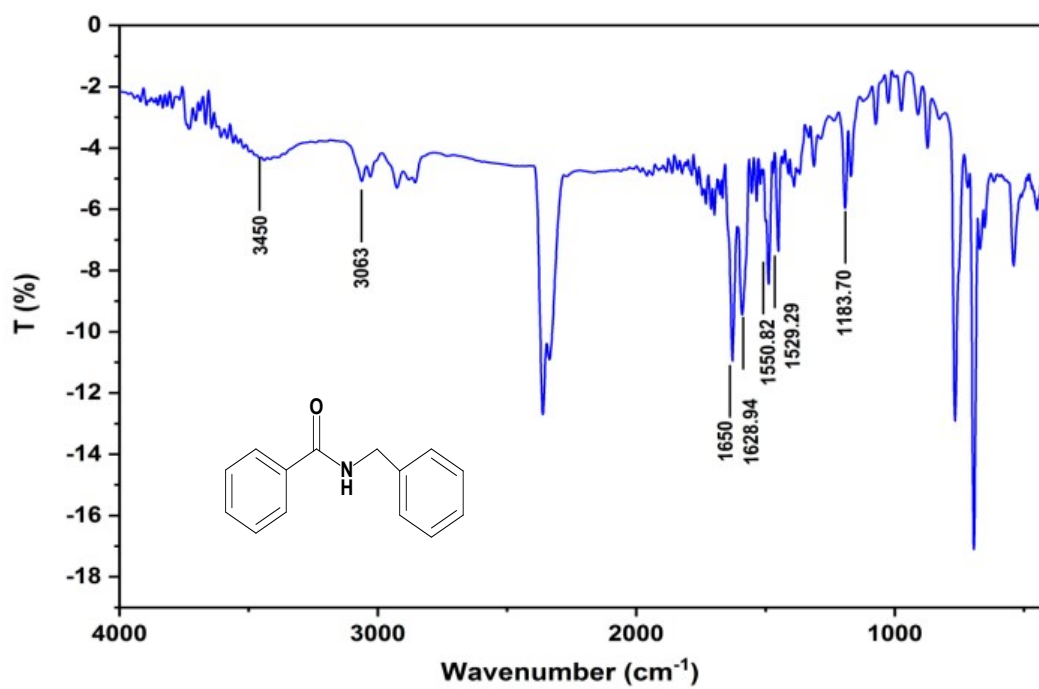

**Figure S5 :** FT -IR spectrum of compound 1

INARS,BCSIR,1H spectrum, Amide Ni/Ac in CDCl3,Kamrojjaman, BUET

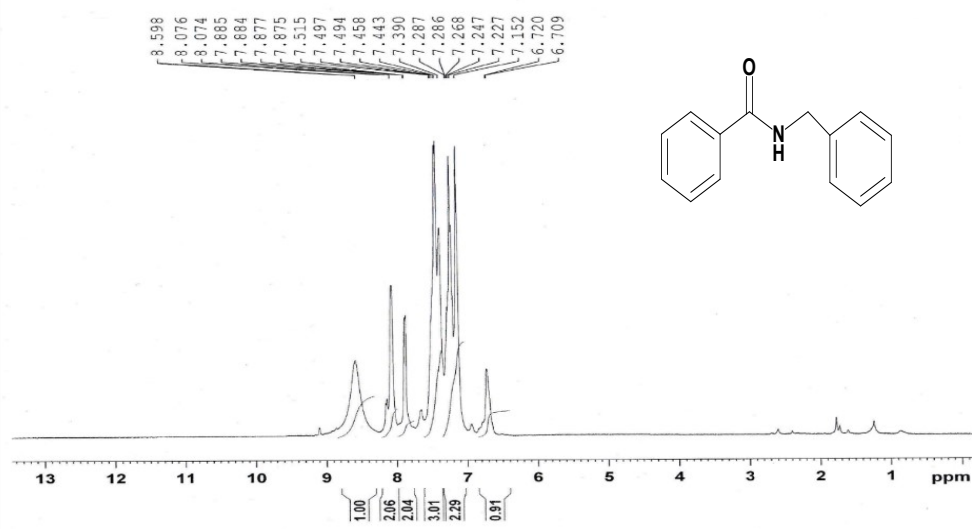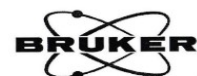

Current Data Parameters  
NAME Sep2019015632  
EXPNO 1  
PROCNO 1

F2 - Acquisition Parameters  
Date\_ 20190924  
Time 12.55  
INSTRUM spect  
PROBHD 5 mm PABBO BB/  
PULPROG zg30  
TD 65536  
SOLVENT CDCl3  
NS 64  
DS 1  
SWH 6002.401 Hz  
FIDRES 0.091589 Hz  
AQ 5.4591489 sec  
RG 176.58  
DE 83.300 usec  
TE 298.7 K  
D1 1.00000000 sec  
TDO 1

CHANNEL f1  
SFO1 400.1724008 MHz  
NUC1 1H  
P1 10.50 usec  
PLW1 17.00000000 W

F2 - Processing parameters  
SI 32768  
SF 400.1700120 MHz  
WDW EM  
SSB 0  
LB 0.30 Hz  
GB 0  
PC 1.00

Figure S6: <sup>1</sup>H-NMR spectrum of compound 1

INARS,BCSIR,13C spectrum, Amide Ni/Ac in CDCl3, BUET

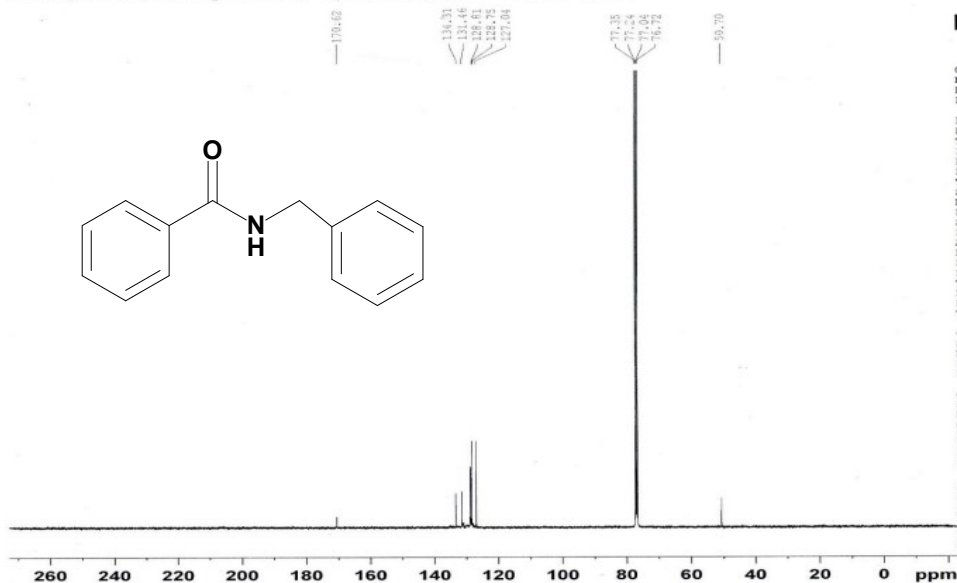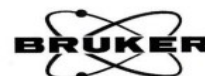

Current Data Parameters  
NAME Jul2019018267  
EXPNO 1  
PROCNO 1

F2 - Acquisition Parameters  
Date\_ 20190708  
Time 11.17  
INSTRUM spect  
PROBHD 5 mm PABBO BB/  
PULPROG zgpg30  
TD 65536  
SOLVENT CDCl3  
NS 5794  
DS 1  
SWH 29761.904 Hz  
FIDRES 0.454131 Hz  
AQ 1.1010048 sec  
RG 197.33  
DE 16.800 usec  
TE 295.4 K  
D1 1.00000000 sec  
D11 0.03000000 sec  
TDO 1

CHANNEL f1  
SFO1 100.6354023 MHz  
NUC1 13C  
P1 11.00 usec  
PLW1 70.00000000 W

CHANNEL f2  
SFO2 400.1720005 MHz  
NUC2 1H  
CPDPRG2 waltz16  
PCPD2 90.00 usec  
PLW2 17.00000000 W  
PLW12 0.23139000 W  
PLW13 0.18742000 W

F2 - Processing parameters  
SI 32768  
SF 100.6228269 MHz  
WDW EM  
SSB 0  
LB 1.00 Hz  
GB 0  
PC 1.40

Figure S7: <sup>13</sup>C-NMR spectrum of compound 1

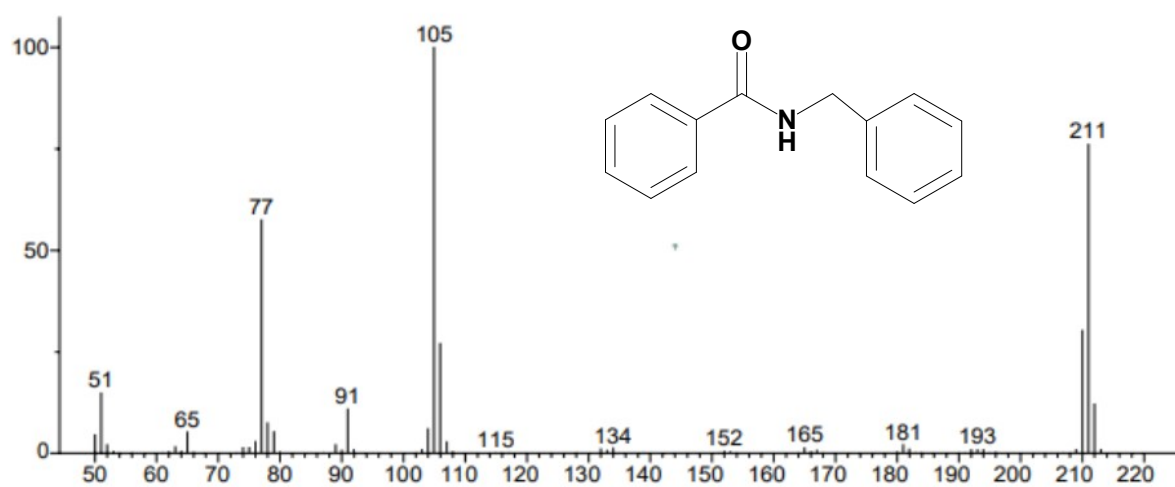

**Figure S8: GC-MS spectrum of compound 1**

### **3. Spectra of compound 2**

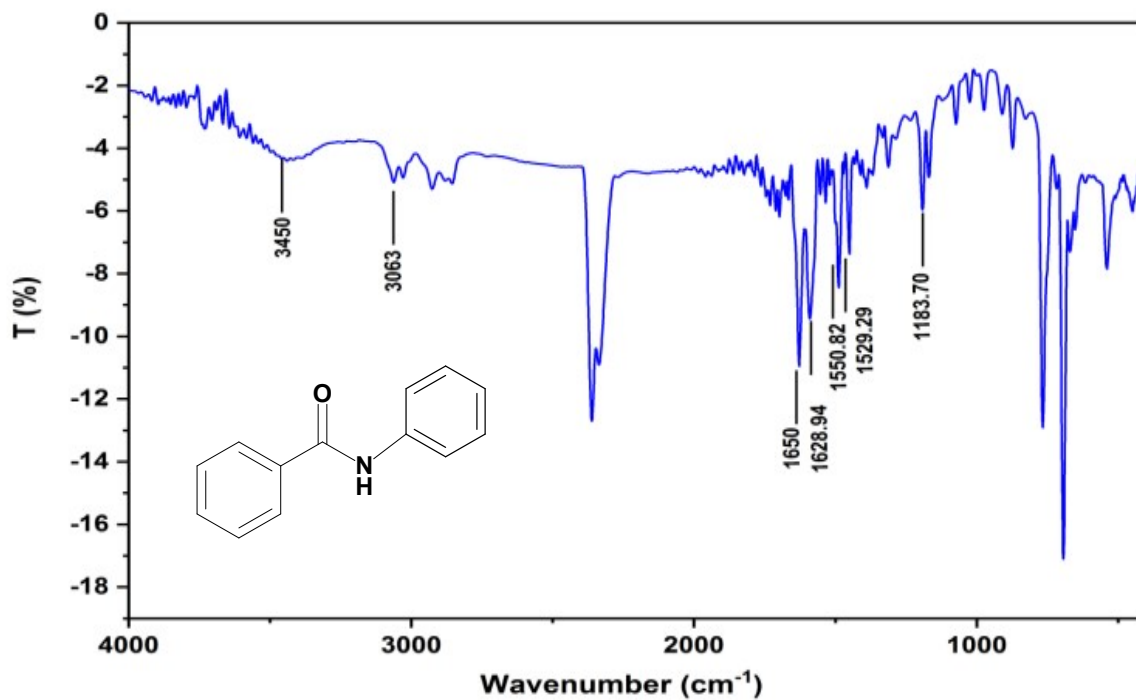

Figure S9: FT-IR spectrum of compound 2

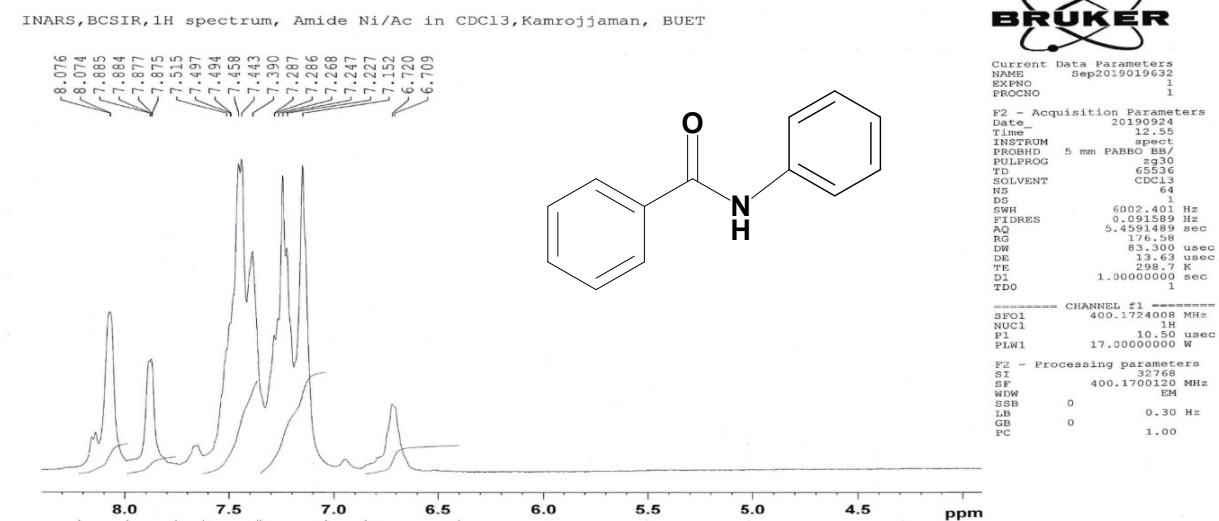

Figure S10: <sup>1</sup>H-NMR spectrum of compound 2

INARS,BCSIR,13C spectrum, Amide N1/AC in CDCl3, BUET

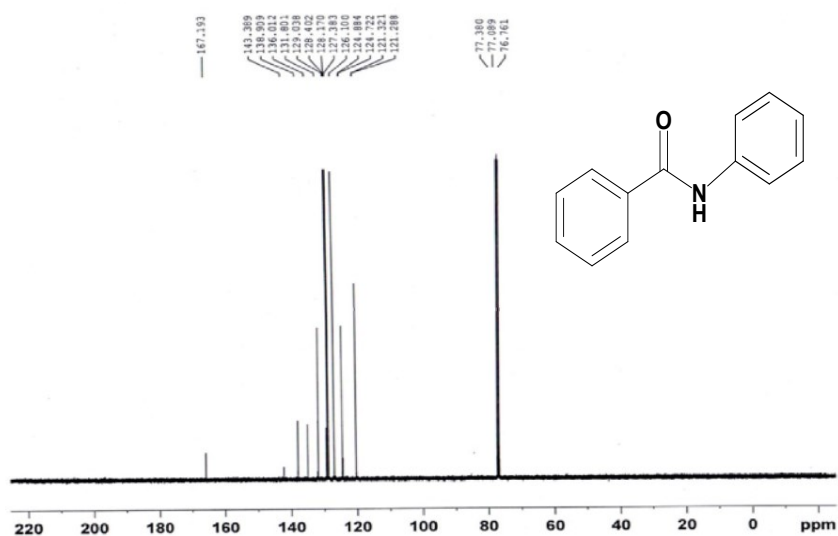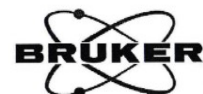

Current Data Parameters  
NAME Sep2019019632  
EXPNO 1  
PROCNO 1

F2 - Acquisition Parameters  
Date\_ 20190924  
Time\_ 12.55  
INSTRUM spect  
PROBHD 5 mm PABBO BB/  
PULPROG zg30  
TD 65536  
SOLVENT CDCl3  
NS 64  
DS 1  
SWH 6002.401 Hz  
FIDRES 0.051583 Hz  
AQ 5.4591489 sec  
RG 176.58  
DW 83.300 usec  
DE 13.63 usec  
TE 298.7 K  
D1 1.00000000 sec  
TD0 1

===== CHANNEL f1 =====  
SFO1 100.6354023 MHz  
NUC1 13C  
P1 11.00 usec  
PLW1 70.00000000 W  
===== CHANNEL f2 =====  
SFO2 400.1720005 MHz  
NUC2 1H  
CPDPRG[2] waltz16  
PCPD2 90.00 usec  
PLW2 17.00000000 W  
PLW12 0.23139000 W  
PLW13 0.18742000 W

F2 - Processing parameters  
SI 32768  
SF 100.6228269 MHz  
WDW EM  
SSB 0  
LB 1.00 Hz  
GB 0  
PC 1.40

Figure S11: <sup>13</sup>C-NMR spectrum of compound 2
